# Supplementary material
Source: publisher site journal article supplement (http://www.spandidos-publications.com/1602/downloadSupplementary)

Figure S1. Validation of successful transfection of miR-202-3p mimic and Gli1 siRNA. (A) Representative images of Gli1 protein bands. (B) Successful transfection of Gli1 siRNA was validated by western blotting. Cultured OPCs were transfected with Gli1 siRNA (50 nmol/l) or blank siRNA (50 nmol/l). (C) Successful transfection of miR-202-3p mimic was validated by reverse transcription-quantitative PCR analysis. Cultured OPCs were transfected with miR-202-3p mimic (30 nmol/l) or negative control (30 nmol/l). Values are expressed mean  $\pm$  standard error of the mean of 6-8 independent trials and are expressed as folds of control. \* $P$ <0.05 vs. NC transfection or blank siRNA. OPCs, oligodendrocyte precursor cells; Gli1, glioma-related oncogene homolog 1.

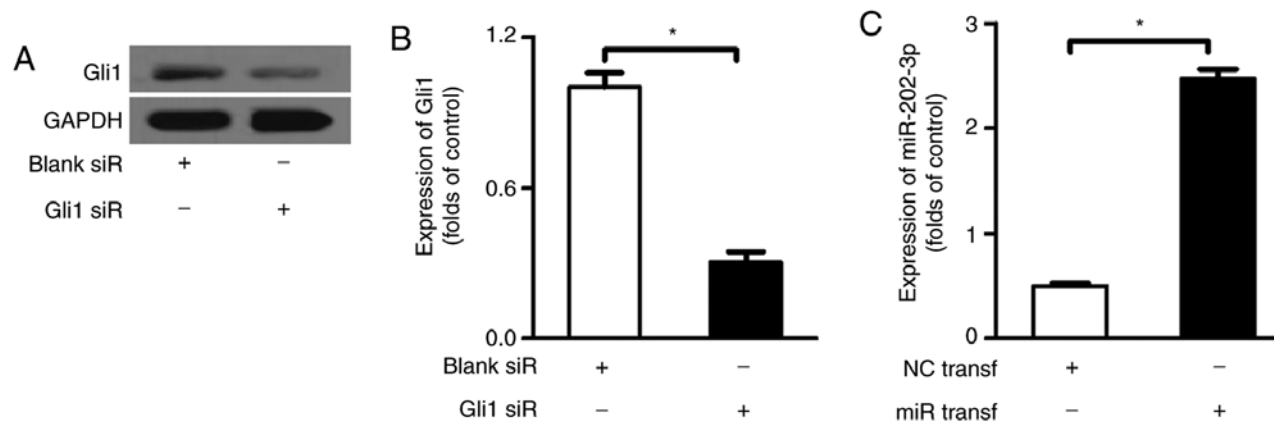

Supplement: Supplementary file 1 [file downloadSupplementary]
